# Supplementary material for: Racial and Ethnic Differences in Weight Loss Strategies among US Adults, a Cross- sectional Study of NHANES 2007 – 2018
Source: Research Square preprint supplement (doi:10.21203/rs.3.rs-7973909/v1), 2025-11-17
Supplement: Supplementary file 1 [file 43d8266d4ad1f84957e42d67.docx]

Table S2. Unadjusted odds of weight loss attempt strategy use among US women ≥20 years, NHANES 2007 – 2018a

|  | Mexican  (n=1,345) | All Additional Hispanic  (n=982) | Black  (n=1,957) | Asian and All Additionalb  (n=938) |
| --- | --- | --- | --- | --- |
| Weight loss attempt strategy | Unadjusted  OR  (95% CI) | Unadjusted  OR  95% CI) | Unadjusted  OR  (95% CI) | Unadjusted  OR  (95% CI) |
| Exercise | 1.06 (0.88,1.26) | 1.00 (0.86,1.17) | 1.51 (1.35,1.7) | 1.43 (1.14,1.81) |
| Ate Less | 0.81 (0.7,0.95) | 0.74 (0.63,0.87) | 1.06 (0.92,1.23) | 0.94 (0.76,1.15) |
| Drank a lot of Water | 1.12 (0.94,1.34) | 1.20 (1.02,1.40) | 1.64 (1.36,1.97) | 1.19 (0.98,1.44) |
| Ate More Fruits, Vegetables, Salads | 0.86 (0.7,1.05) | 0.97 (0.78,1.20) | 1.14 (0.91,1.43) | 1.24 (1.03,1.49) |
| Ate Low Calorie Foods | 0.72 (0.61,0.85) | 0.79 (0.63,0.97) | 0.89 (0.78,1.01) | 0.81 (0.68,0.96) |
| Ate Less Fat | 1.39 (1.17,1.65) | 1.43 (1.21,1.70) | 1.25 (1.07,1.45) | 1.32 (1.09,1.59) |
| Ate Less Sugar | 1.01 (0.82,1.24) | 0.89 (0.74,1.08) | 1.14 (0.96,1.36) | 1.30 (1.04,1.63) |
| Changed Eating Habits | 0.96 (0.78,1.18) | 1.31 (1.03,1.67) | 1.33 (1.12,1.59) | 1.32 (1.07,1.61) |
| Ate Fewer Carbs | 0.71 (0.59,0.86) | 0.84 (0.68,1.04) | 0.74 (0.61,0.9) | 1.09 (0.87,1.36) |
| Skipped Meals | 1.16 (0.96,1.4) | 0.94 (0.73,1.20) | 1.85 (1.57,2.17) | 1.22 (0.89,1.66) |
| Ate Diet Foods | 0.79 (0.58,1.08) | 0.76 (0.60,0.96) | 1.07 (0.87,1.32) | 0.90 (0.71,1.15) |
| Weight Loss Program | 0.36 (0.23,0.58) | 0.48 (0.31,0.75) | 0.58 (0.45,0.75) | 0.47 (0.29,0.75) |
| Followed Special Diet | 0.63 (0.45,0.87) | 0.53 (0.39,0.73) | 0.83 (0.65,1.06) | 0.70 (0.47,1.05) |
| Followed a Liquid Diet | 0.91 (0.62,1.34) | 0.85 (0.59,1.22) | 1.36 (1.04,1.78) | 0.73 (0.45,1.18) |
| Took Diet Pills Prescribed by a Doctor | 1.27 (0.91,1.77) | 1.17 (0.75,1.82) | 1.67 (1.2,2.31) | 0.60 (0.32,1.13) |
| Used Non-Prescription Supplements | 1.72 (1.31,2.26) | 1.37 (1.02,1.85) | 1.24 (0.96,1.6) | 0.91 (0.57,1.47) |
| Started to Smoke or Took Laxatives or Vomited | 1.39 (0.88,2.20) | 1.61 (0.90,2.9) | 2.77 (1.84,4.18) | 0.81 (0.40,1.64) |

a Data for women ≥ 20 years of age who attempted weight loss in the past 12 months from the National Health and Nutrition Examination Survey (NHANES) 2007 – 2018 (n= 8,523). All estimates are odds ratios (OR) and 95% confidence intervals (95% CI) obtained from separate logistic regression models that regressed use of each weight loss strategy (binary outcome) on race and ethnicity (indicator variables) in Stata version 17 (2017, StataCorp). All estimates take into account survey design and sample weights. The White race subgroup (n=3,301) was the referent group in all models.

b Includes Asian and all additional groups incl. Multiracial or Multiethnic.
