# Supplementary material for: Racial and Ethnic Differences in Weight Loss Strategies among US Adults, a Cross- sectional Study of NHANES 2007 – 2018
Source: Research Square preprint supplement (doi:10.21203/rs.3.rs-7973909/v1), 2025-11-17
Supplement: Supplementary file 2 [file 53e106248d1767c3750707de.docx]

Table S5. Odds of weight loss strategy use among US men who lost ≥ 10 pounds,NHANES2007 – 2018a

|  | Mexican  (n=285) | | All Additional Hispanic (n=197) | | Black  (n=464) | | Asian and All Additionalb  (n=187) | |
| --- | --- | --- | --- | --- | --- | --- | --- | --- |
| Weight Loss Strategy | Unadjusted  OR  (95% CI) | Adjusted  OR  (95% CI) | Unadjusted  OR  (95% CI) | Adjusted  OR  (95% CI) | Unadjusted  OR  (95% CI) | Adjusted  OR  (95% CI) | Unadjusted  OR  (95% CI) | Adjusted  OR  (95% CI) |
| Exercise | 1.3 (0.92,1.83) | 1.21 (0.79,1.85) | 1.31 (0.88,1.96) | 1.15 (0.72,1.84) | 1.64 (1.26,2.13) | 1.71 (1.3,2.23) | 0.93 (0.58,1.48) | 0.67 (0.43,1.06) |
| Ate Less | 0.83 (0.57,1.2) | 1.05 (0.69,1.61) | 0.68 (0.47,0.99) | 0.92 (0.57,1.48) | 0.91 (0.69,1.19) | 0.91 (0.7,1.19) | 1.10 (0.63,1.92) | 1.31 (0.75,2.3) |
| Drank a lot of Water | 1.62 (1.19,2.2) | 1.61 (1.13,2.29) | 1.59 (1.17,2.16) | 1.60 (1.05,2.44) | 1.88 (1.45,2.45) | 1.96 (1.49,2.59) | 2.12 (1.33,3.4) | 1.59 (0.92,2.76) |
| Ate More Fruits, Vegetables, Salads | 0.82 (0.56,1.22) | 0.77 (0.51,1.17) | 0.93 (0.59,1.45) | 0.79 (0.47,1.32) | 0.99 (0.74,1.32) | 1.02 (0.75,1.39) | 1.20 (0.74,1.93) | 0.73 (0.42,1.26) |
| Ate Low Calorie Foods | 0.78 (0.55,1.09) | 0.96 (0.63,1.48) | 0.82 (0.57,1.19) | 1.00 (0.63,1.58) | 0.79 (0.6,1.04) | 0.86 (0.64,1.15) | 0.93 (0.56,1.54) | 0.92 (0.49,1.72) |
| Ate Less Fat | 1.15 (0.81,1.62) | 1.21 (0.83,1.77) | 1.50 (1.08,2.07) | 1.46 (0.98,2.18) | 1.19 (0.9,1.58) | 1.17 (0.87,1.59) | 0.86 (0.55,1.35) | 0.83 (0.5,1.38) |
| Ate Less Sugar | 1.09 (0.74,1.62) | 1.28 (0.8,2.05) | 1.13 (0.71,1.82) | 1.35 (0.78,2.32) | 1.00 (0.75,1.33) | 1.05 (0.79,1.41) | 2.83 (1.9,4.2) | 2.34 (1.43,3.82) |
| Changed Eating Habits | 1.13 (0.82,1.57) | 1.18 (0.81,1.72) | 1.36 (0.83,2.23) | 1.38 (0.79,2.4) | 1.39 (1.04,1.87) | 1.56 (1.15,2.12) | 3.00 (1.94,4.65) | 2.31 (1.35,3.98) |
| Ate Fewer Carbs | 0.74 (0.52,1.07) | 0.89 (0.57,1.38) | 1.05 (0.73,1.51) | 1.23 (0.78,1.95) | 0.80 (0.58,1.09) | 0.87 (0.62,1.22) | 1.63 (0.97,2.73) | 1.51 (0.8,2.85) |
| Skipped Meals | 1.31 (0.83,2.05) | 1.49 (0.89,2.51) | 1.09 (0.67,1.77) | 1.42 (0.79,2.53) | 1.49 (1.03,2.16) | 1.44 (0.98,2.13) | 1.99 (0.89,4.44) | 2.18 (0.89,5.33) |
| Ate Diet Foods | 0.66 (0.31,1.4) | 0.63 (0.28,1.43) | 0.79 (0.34,1.82) | 0.79 (0.36,1.72) | 1.09 (0.59,2.01) | 1.13 (0.6,2.11) | 2.27 (1.08,4.75) | 2.48 (1.08,5.7) |
| Weight Loss Program | 0.09 (0.02,0.41) | 0.14 (0.03,0.65) | 0.08 (0.01,0.59) | 0.09 (0.01,0.81) | 0.30 (0.1,0.88) | 0.34 (0.12,0.95) | 0.51 (0.12,2.28) | 0.74 (0.2,2.72) |
| Followed Special Diet | 0.19 (0.08,0.45) | 0.16 (0.05,0.51) | 0.09 (0.01,0.67) | 0.07 (0.01,0.72) | 0.58 (0.32,1.04) | 0.62 (0.33,1.19) | 0.87 (0.36,2.1) | 0.63 (0.15,2.58) |
| Followed a Liquid Diet | 0.91 (0.35,2.36) | 0.81 (0.29,2.26) | 1.87 (0.65,5.34) | 1.77 (0.56,5.6) | 0.84 (0.34,2.07) | 0.73 (0.28,1.9) | 1.49 (0.47,4.65) | 1.08 (0.29,4.09) |
| Took Diet Pills Prescribed by a Doctor | 0.93 (0.24,3.58) | 0.66 (0.18,2.5) | 3.95 (1.41,11.07) | 3.98 (1.3,12.13) | 1.01 (0.34,2.97) | 0.78 (0.27,2.3) | 0.39 (0.07,2.26) | 0.30 (0.04,2.2) |
| Used Non-Prescription Supplements | 1.68 (0.92,3.06) | 1.89 (0.94,3.79) | 1.53 (0.65,3.63) | 1.7 (0.71,4.05) | 1.56 (0.9,2.71) | 1.54 (0.9,2.63) | 1.23 (0.52,2.88) | 1.38 (0.61,3.13) |
| Started to Smoke or Took Laxatives or Vomited | 1.85 (0.58,5.95) | 2.69 (0.72,10.13) | 3.73 (1.01,13.77) | 6.42 (1.69,24.38) | 5.19 (2.12,12.72) | 5.12 (1.9,13.79) | 3.63 (0.75,17.73) | 4.73 (1.03,21.75) |

a Data for men ≥ 20 years of age who reported an intentional weight loss of ≥ 10 pounds in the past 12 months from the National Health and Nutrition Examination Survey (NHANES) 2007 – 2018 (n= 1,947). All estimates are odds ratios (OR) and 95% confidence intervals (95% CI) obtained from separate multivariable logistic regression models adjusted for age, education, marital status, birth in the United States, insurance coverage and survey year in Stata version 17 (2017, StataCorp). All estimates take into account survey design and sample weights. The White race subgroup (n= 814) was the referent group in all models.

b Includes Asian and all additional groups incl. Multiracial or Multiethnic.
