# Supplementary material for: Racial and Ethnic Differences in Weight Loss Strategies among US Adults, a Cross- sectional Study of NHANES 2007 – 2018
Source: Research Square preprint supplement (doi:10.21203/rs.3.rs-7973909/v1), 2025-11-17
Supplement: Supplementary file 5 [file f165e6e154fbdfe6cd10c7c1.docx]

Table S1. Characteristics of US adults ≥ 20 years according to inclusion or exclusion in the primary analytic sample, NHANES 2007 – 2018a

| Characteristic | Included  (n=14,344) | Excluded  (n=796) | p-value |
| --- | --- | --- | --- |
| % | 98.4 ± 0.2 | 1.6 ± 0.2 |  |
| Gender | 14,344 | 796 | 0.74 |
| Male | 40.8 ± 0.5 | 42.1 ± 3.7 |  |
| Female | 59.2 ± 0.5 | 57.9 ± 3.7 |  |
| Race | 14,344 | 796 | 0.001 |
| Mexican | 8.7 ± 0.8 | 16.4 ± 2.4 |  |
| Other Hispanic | 5.9 ± 0.5 | 8.3 ± 2 |  |
| White | 66.4 ± 1.4 | 53.8 ± 4.3 |  |
| Black | 11.3 ± 0.8 | 12.8 ± 2.3 |  |
| Other | 7.8 ± 0.5 | 8.7 ± 1.9 |  |
| How do you consider your weight? (n) | 14.344 | 734 |  |
| Overweight | 76.2 ± 0.5 | 62.9 ± 4.7 | <0.001 |
| Underweight | 0.9 ± 0.1 | 9.2 ± 4.5 |  |
| About Right | 22.8 ± 0.5 | 27.9 ± 3.9 |  |
| Would you like to weigh more, less or the same? (n) | 14,344 | 748 | <0.01 |
| More | 1.0 ± 0.1 | 6.2 ± 3.9 |  |
| Less | 89.1 ± 0.4 | 77.5 ± 4.3 |  |
| The Same | 10.0 ± 0.3 | 16.3 ± 2.7 |  |
| Age Group (years) (n) | 14,344 | 796 | 0.09 |
| 20-39 | 37.5 ± 0.8 | 34.0 ± 4.1 |  |
| 40-59 | 39.4 ± 0.7 | 35.1 ± 3.8 |  |
| 60-80 | 23.1 ± 0.6 | 30.8 ± 3.8 |  |
| Education Level (n) | 14,344 | 789 | 0.004 |
| Less than High school | 11.7 ± 0.5 | 18.5 ± 2.6 |  |
| High School | 21.3 ± 0.6 | 26.4 ± 3.7 |  |
| Some College | 33.9 ± 0.7 | 32.9 ± 3.9 |  |
| College Graduate | 33.1 ± 1.1 | 22.2 ± 3.7 |  |
| Marital Status (n) | 14,344 | 786 | 0.003 |
| Never Married | 17.6 ± 0.6 | 26.8 ± 4.2 |  |
| Married | 64.5 ± 0.7 | 50.7 ± 4.4 |  |
| Previously Married | 17.9 ± 0.5 | 22.5 ± 2.9 |  |
| Born in the United States (n) | 14,344 | 786 | 0.05 |
| Yes | 83.9 ± 0.8 | 79.3 ± 2.6 |  |
| Insurance Coverage (n) | 14,344 | 776 | 0.30 |
| Yes | 85.4 ± 0.5 | 82.5 ± 3.1 |  |
| Body Mass Index Category (kg/m2) (n) | 14,344 | 144 | <0.001 |
| <18.5 | 0 | 23.5 ± 9.1 |  |
| 18.5 to <25 | 15.4 ± 0.5 | 22.7 ± 7.7 |  |
| 25 to <30 | 33.3 ± 0.5 | 23.0 ± 3.3 |  |
| 30 to <35 | 26.4 ± 0.5 | 17.0 ± 3.5 |  |
| ≥35 | 24.9 ± 0.5 | 13.8 ± 2.9 |  |

a Data for adults ≥ 20 years of age who attempted weight loss in the past 12 months from the National Health and Nutrition Examination Survey (NHANES)2007 – 2018 (n= 15,140). Unless otherwise noted, values are proportions (% ± SE). All proportions take into account survey design and sample weights. Sample sizes vary for excluded participants due to missing data. P-values for chi2 tests of the unadjusted percentage distributions of categorical covariates of included participants compared to the percentage distribution of covariates of excluded participants. Differences considered statistically significant at p<0.01 after Bonferroni correction for multiple comparisons (p<0.05/10=0.01).
